# Supplementary material for: Z-Ligustilide Combined with Cisplatin Reduces PLPP1-Mediated Phospholipid Synthesis to Impair Cisplatin Resistance in Lung Cancer
Source: Preprints.org preprint supplement (doi:10.20944/preprints202307.1674.v1), 2023-07-25
Supplement: Supplementary file 1 [file supplementary]

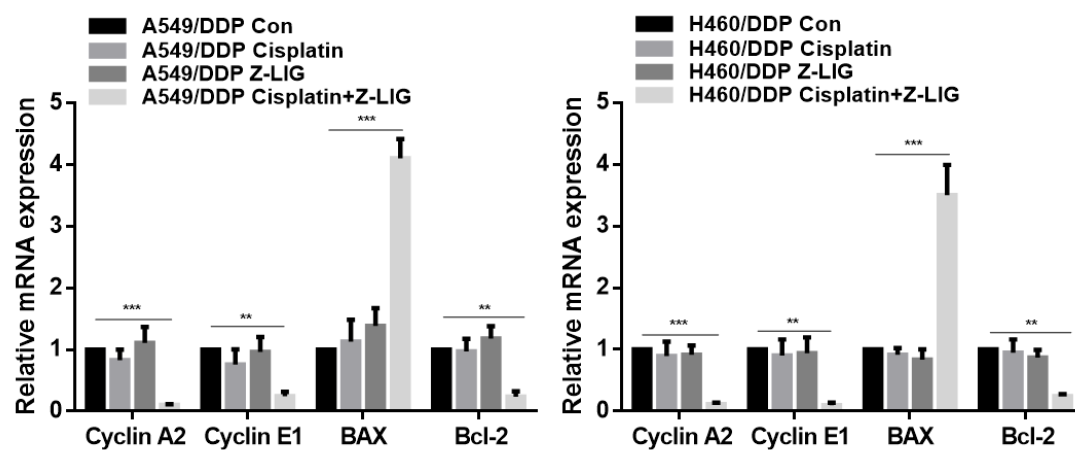

**Figure S1.** The Z-ligustilide+cisplatin induced cell apoptosis. mRNA expression of Cyclin A2, Cyclin E1, BAX and Bcl-2 in A549/DDP and H460/DDP, A549/DDP and H460/DDP treated with cisplatin and Z-ligustilide alone or in combination. \*\* $p < 0.01$  and \*\*\* $p < 0.001$ .

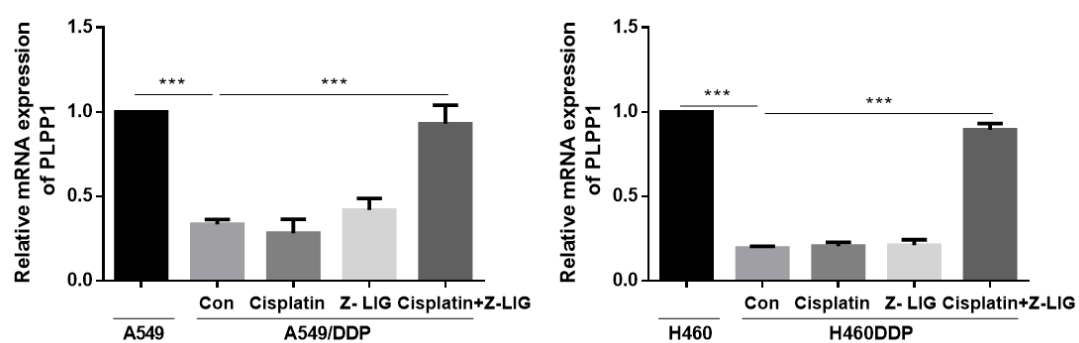

**Figure S2.** The Z-ligustilide+cisplatin reversed the expression of PLPP1. mRNA level of PLPP1 was determined by real-time PCR in A549 and H460, A549/DDP and H460/DDP, A549/DDP and H460/DDP treated with cisplatin and Z-ligustilide alone or in combination. \*\*\* $p < 0.001$ .

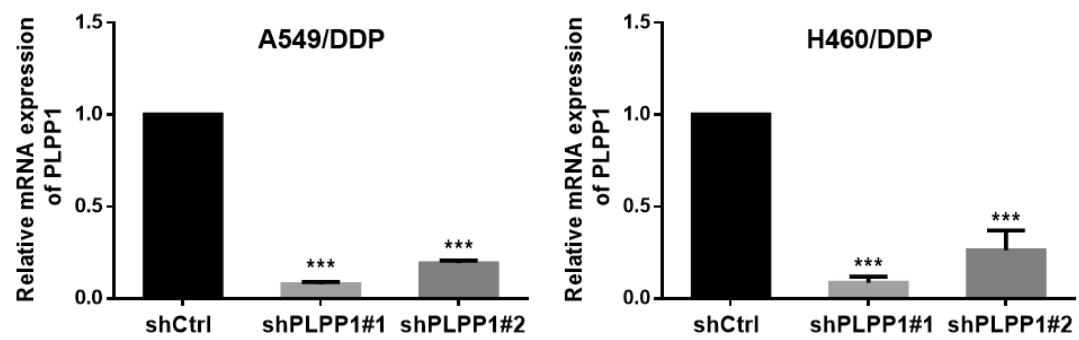

**Figure S3.** The validation of PLPP1 knockdown efficiency. mRNA expression of PLPP1 in shCtrl and PLPP1 knockdown A549/DDP and H460/DDP cells, respectively. \*\*\* $p < 0.001$ .

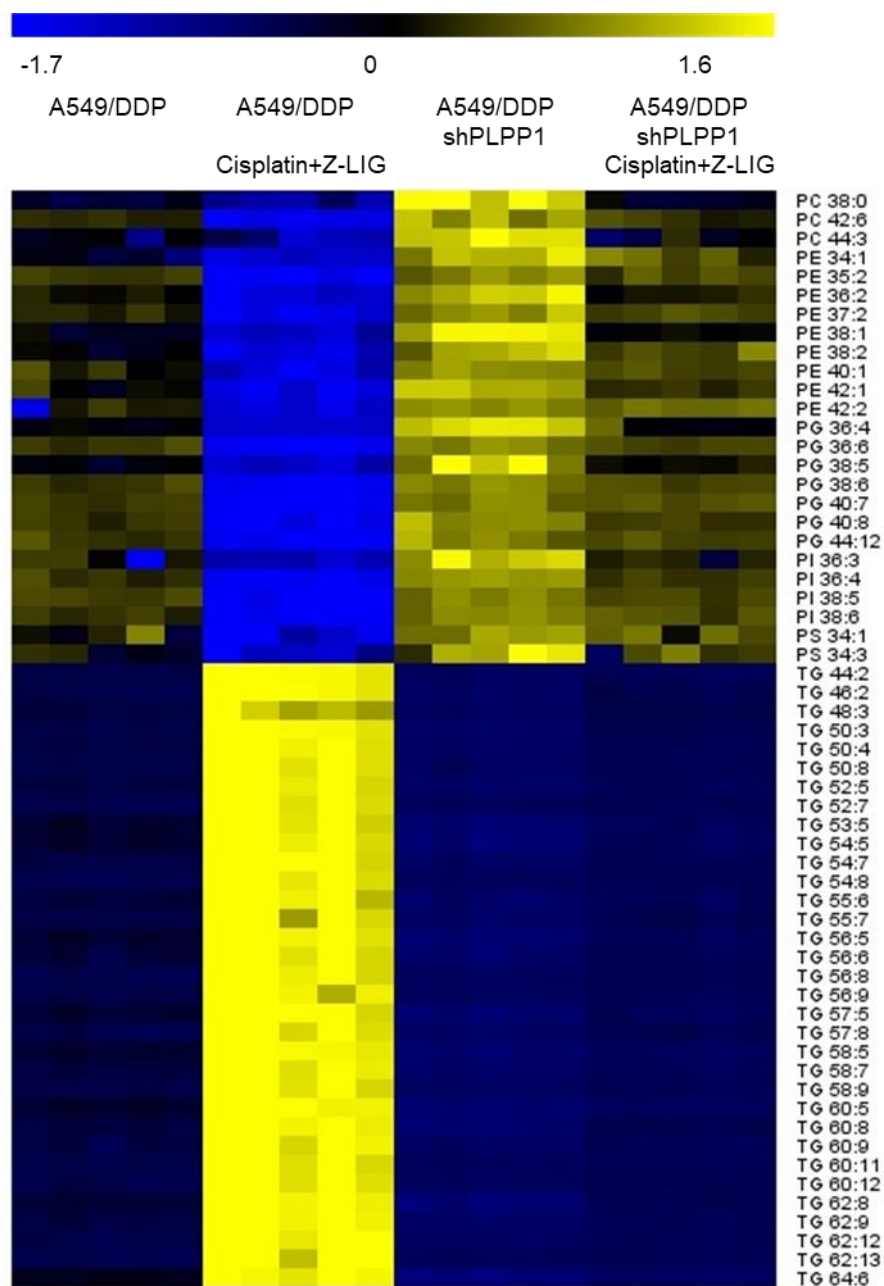

**Figure S4.** Heat map of the differential lipids in shCtrl and PLPP1 knockdown A549/DDP cells with or without Z-ligustilide+cisplatin treatment.
