# Supplementary material for: Z-Ligustilide Combined with Cisplatin Reduces PLPP1-Mediated Phospholipid Synthesis to Impair Cisplatin Resistance in Lung Cancer
Source: Preprints.org preprint supplement (doi:10.20944/preprints202307.1674.v1), 2023-07-25
Supplement: Supplementary file 2 [file supplementary]

Archive with 1 entries (1 files):
- Supplemental Figures.pdf
